# Supplementary figures and images for: Does C-methylcalix[4]resorcinarene always adopt the crown shape conformation? A resorcinarene/bipyridine/decamethylruthenocene supramolecular clathrate with a novel framework structure
Source: Royal Society of Chemistry journal article supplement (doi:10.1039/b004783j), 2000-01-01

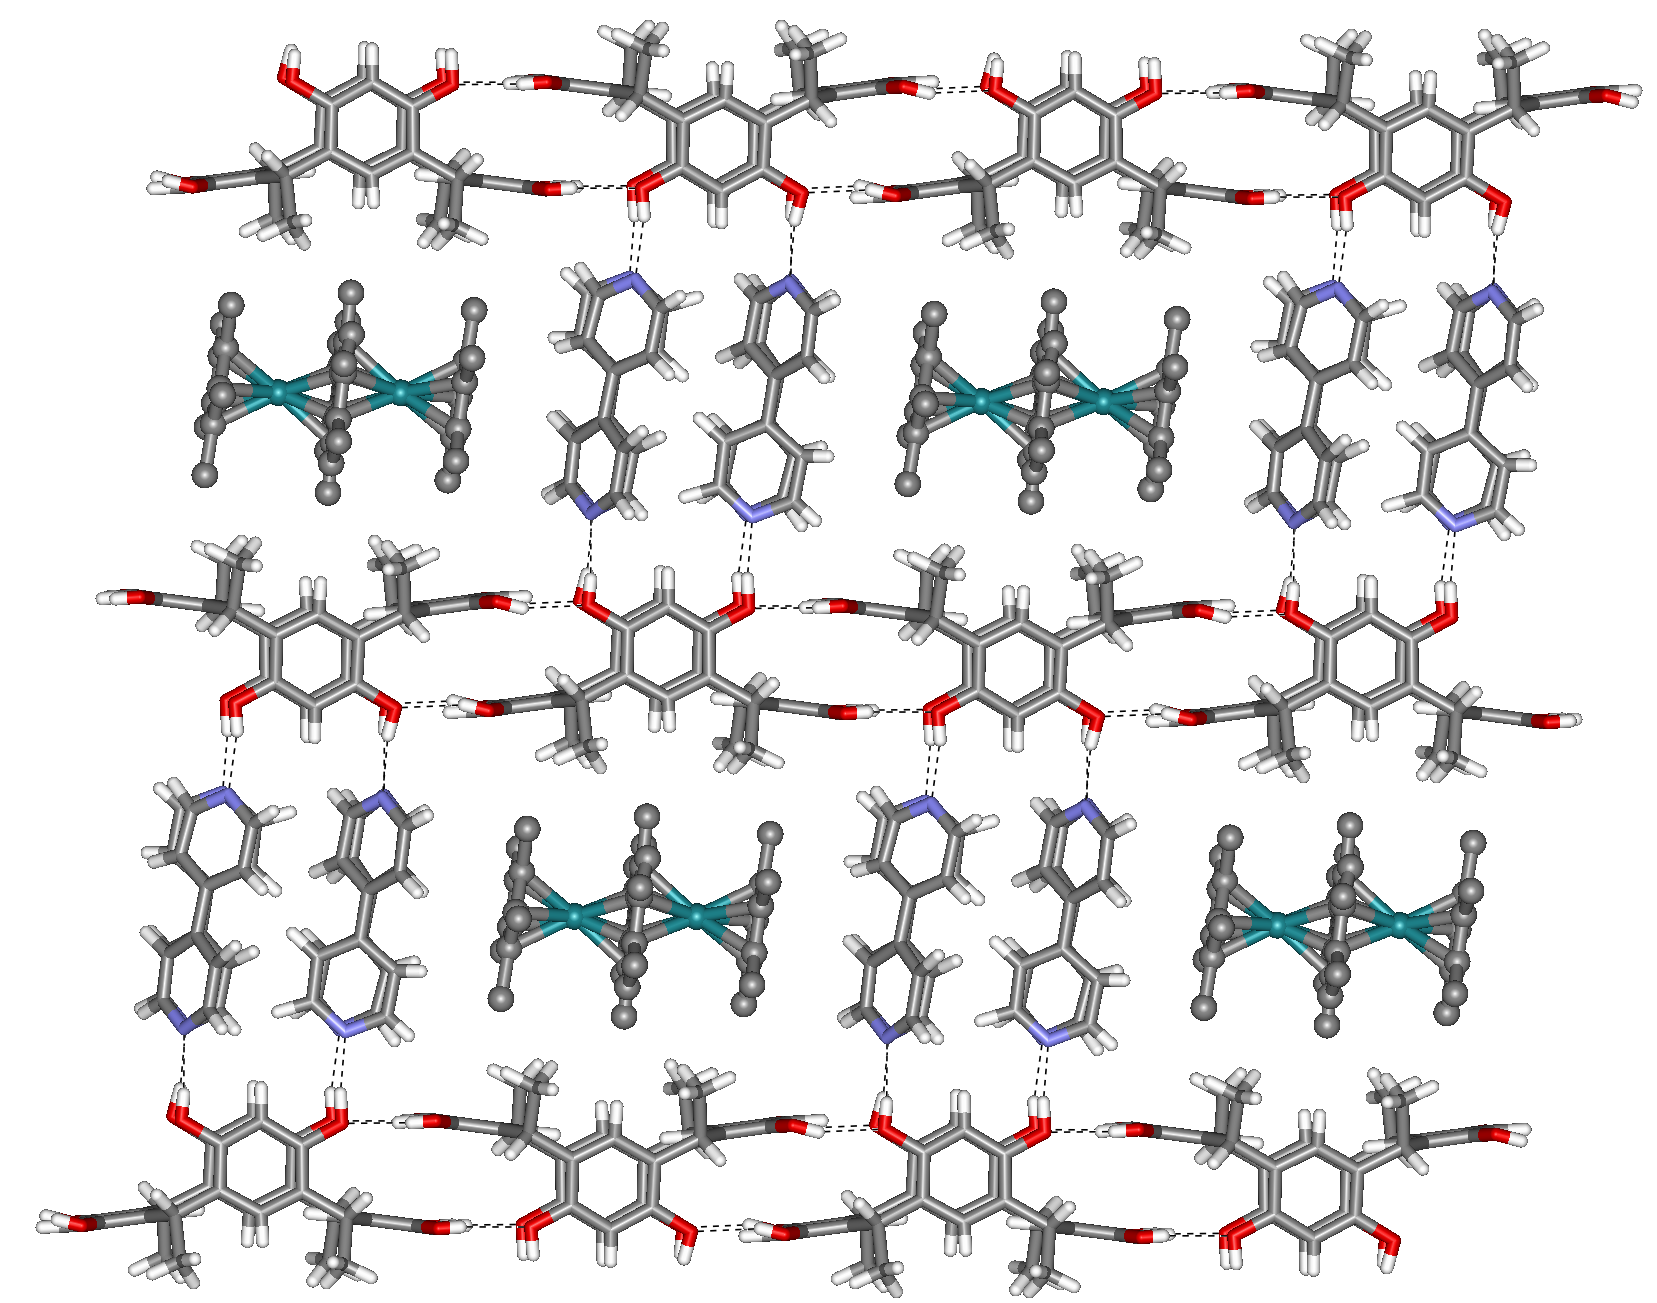

Supplement: b004783j.doc [file b004783j.doc]
